# Supplementary material for: Allelic Variation at the 8q23.3 Colorectal Cancer Risk Locus Functions as a Cis-Acting Regulator of EIF3H
Source: PLOS journal article supplement (doi:10.1371/journal.pgen.1001126), 2010-09-16

**Figure S1.** LD plot of SNPs ( $MAF \geq 0.05$ ) identified through re-sequencing of the 22 Kb interval. Short-listed SNPs highlighted in turquoise are correlated with rs16892766 ( $r^2 \text{ LD} \geq 0.5$ ).

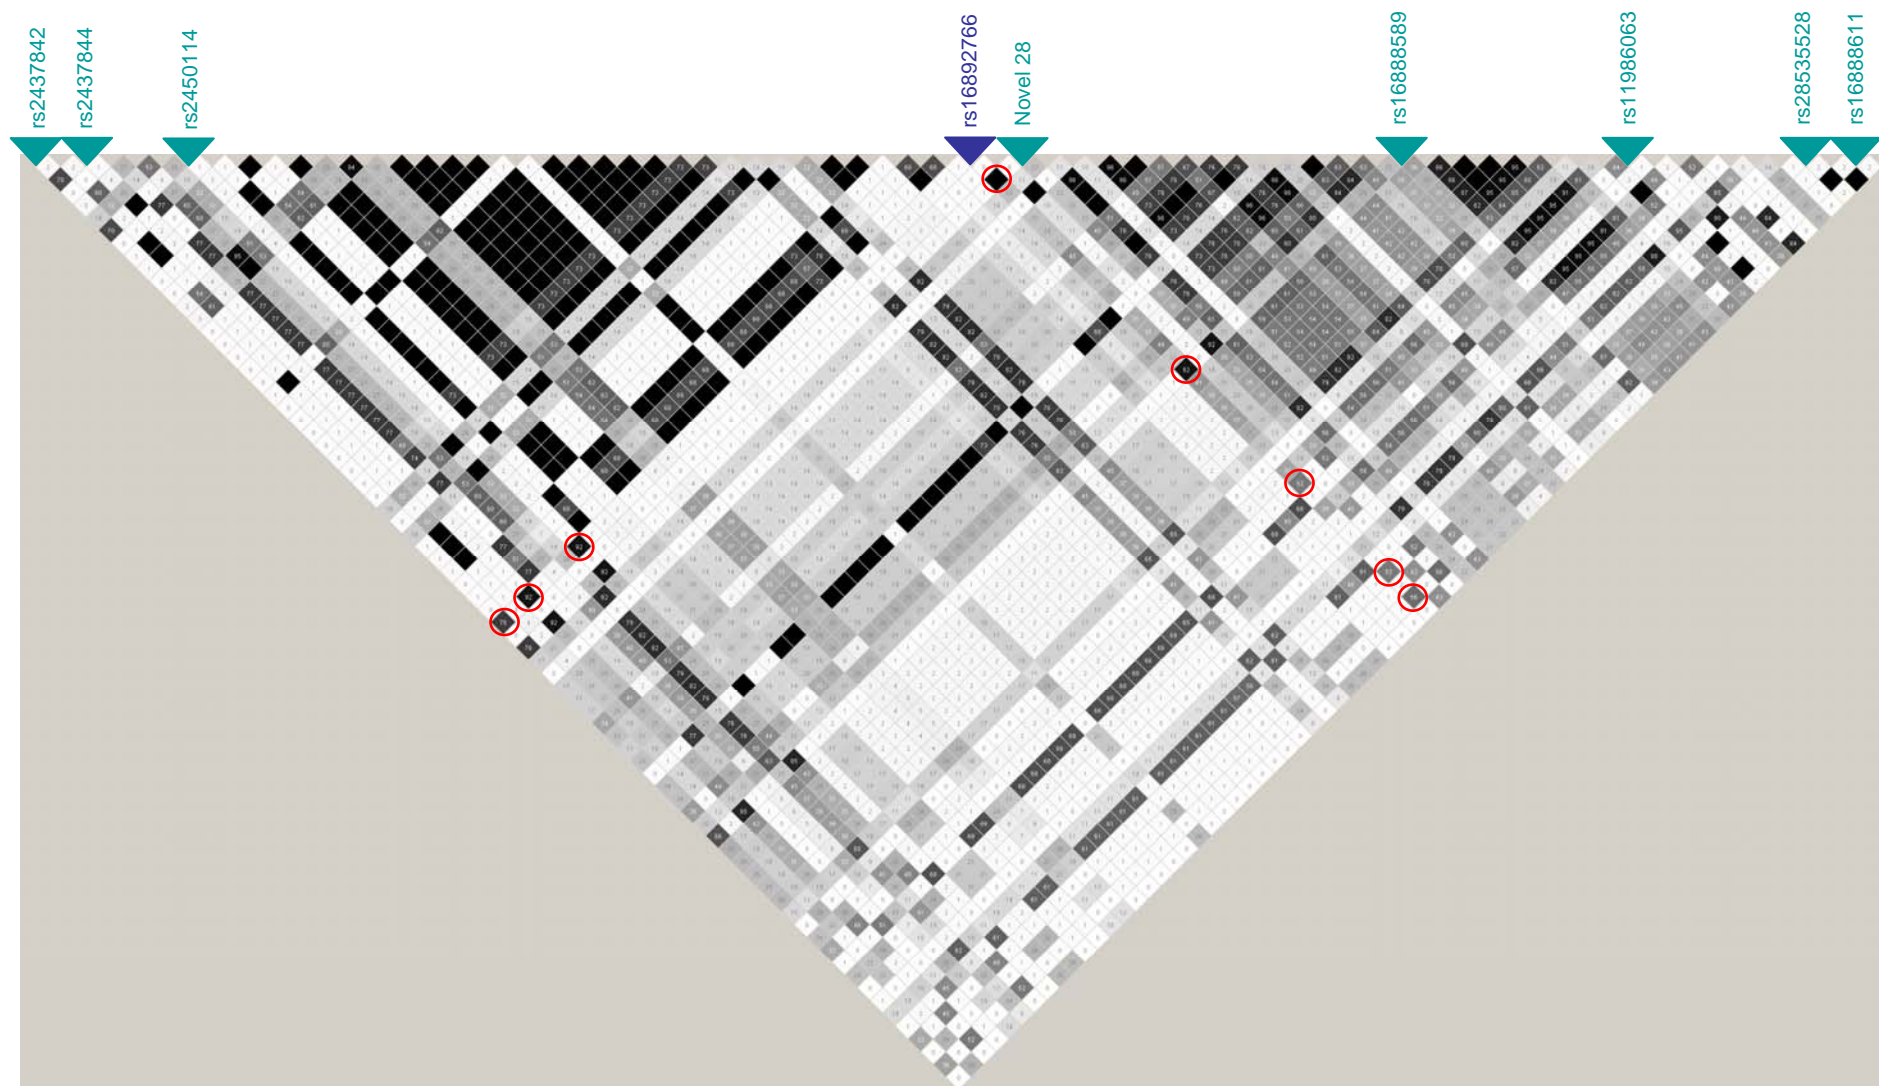

Supplement: S2 (10.1371/journal.pgen.1001126.s002) [file journal.pgen.1001126.s002]
